# Supplementary material for: Design and synthesis of an on–off “click” fluorophore that executes a logic operation and detects heavy and transition metal ions in water and living cells
Source: Royal Society of Chemistry journal article supplement (doi:10.1039/c3ob40075a), 2013-01-01

## **Design and Synthesis of an ON-OFF “Click” Fluorophore That Executes a Logic Operation and Detects Heavy and Transition Metal Ions in Water and Living Cell**

**Ganesh Chandra Midya,<sup>a,b</sup> Sushovan Paladhi,<sup>a,b</sup> Sudipta Bhowmick,<sup>a,b</sup> Subhadeep Saha,<sup>a</sup> and Jyotirmayee Dash\*<sup>a,b</sup>**

*<sup>a</sup>Department of Organic Chemistry, Indian Association for the Cultivation of Science  
Jadavpur, Kolkata-700032, India; Email: ocjd@iacs.res.in*

*<sup>b</sup>Department of Chemical Sciences, Indian Institute of Science Education and Research Kolkata  
Mohanpur, West Bengal 741252, India*

|     |                                  |    |
|-----|----------------------------------|----|
| 1.0 | Fluorimetric titration           | 2  |
| 2.0 | Computational method             | 7  |
| 3.0 | Cell culture method              | 11 |
| 4.0 | NMR spectra of all the compounds | 12 |

### 1.0 Fluorimetric titration:

The fluorescence spectra were recorded on a Horiba Jobin Yvon Fluoromax 3 instrument at 25 °C in a thermostated cell holder using quartz cuvette with a 1 cm path-length and each titration was performed using milliQ filtered water. All the binding constants of fluorescence spectral data have been calculated using the following equations (1-3) with the help of Graphpad prism 5.0 (GraphPad Software, San Diego, CA). In this experimental design, aliquots of different metal salts were added to a single concentration of the ligand **5**, and scanned after each addition.

The equations are:

$$LR = (X + L_{tot} + K_d) - \frac{\sqrt{(X + L_{tot} + K_d)^2 - 4 \times X \times L_{tot}}}{2} \quad (1)$$

$$L = L_{tot} - LR \quad (2)$$

$$Y = BKG + MF \times L + FR \times MF \times LR \quad (3)$$

$L_{tot}$ : Total concentration of **5** (Same units as X).

$BKG$ : Background fluorescence w/o receptors (Same units as Y);

$MF$ : Molar fluorescence of free Ligand (Y units divided by X units); X : Concentration of metal salts.  $K_d$ : Dissociation constant (X units);

$FR$ : Fluorescence ratio.  $MF$  of bound ligand =  $FR * MF$  (unitless ratio) so  $FR > 1$  means binding causes turn on;  $FR < 1$  means binding causes turn off .

**Table S1. Fluorescence emission properties of **5**.<sup>1</sup>**

| Compound                                 | $\lambda_{abs}$ (nm) | $\lambda_{em}$ (nm) | $\Phi$ <sup>[d]</sup> |
|------------------------------------------|----------------------|---------------------|-----------------------|
| <b>5</b>                                 | 300                  | 390                 | 0.02                  |
| <b>5</b> + Zn <sup>2+</sup> <sup>b</sup> | 300                  | 390                 | 0.4                   |
| <b>5</b> + Cd <sup>2+</sup> <sup>c</sup> | 300                  | 390                 | 0.321                 |

<sup>a</sup>All data were obtained milliQ filtered water (pH 7). <sup>b</sup>The data were measured in the presence of Zn<sup>2+</sup> (1.0 equiv) with respect to **5** (25  $\mu$ M). <sup>c</sup>The data were measured in the presence of Cd<sup>2+</sup> (1.0 equiv) with respect to **5** (25  $\mu$ M). <sup>d</sup>The fluorescence quantum yields were determined by using quinine sulfate in 0.1M H<sub>2</sub>SO<sub>4</sub> ( $\Phi = 0.577$  as standard).<sup>1</sup>

<sup>1</sup> J. R. Lakowicz, Principles of Fluorescence Spectroscopy; Plenum Press: New York, 1983.

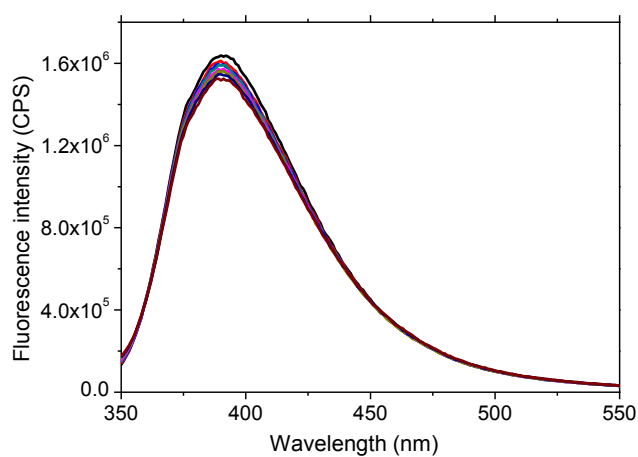

**Figure S1.** Fluorimetric titration spectra of **5** (25  $\mu\text{M}$ ) with  $\text{Fe}^{3+}$  (0-25  $\mu\text{M}$ ).

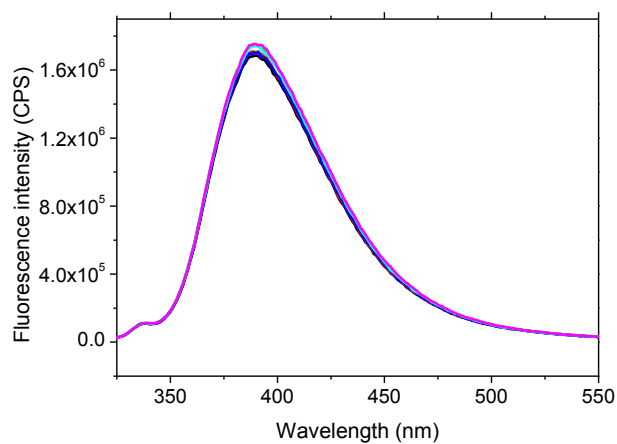

**Figure S2.** Fluorimetric titration spectra of **5** (25  $\mu\text{M}$ ) with  $\text{Li}^+$  (0-25  $\mu\text{M}$ ).

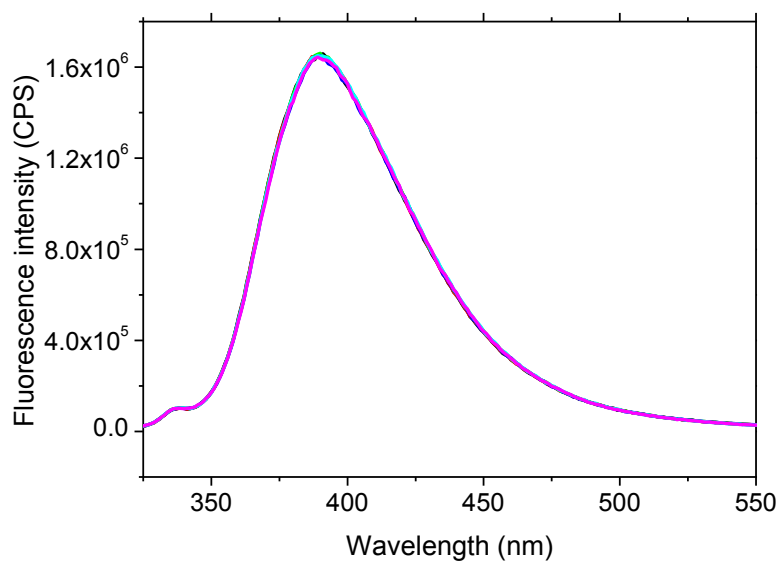

**Figure S3.** Fluorimetric titration spectra of **5** (25  $\mu\text{M}$ ) with  $\text{Na}^+$  (0-25  $\mu\text{M}$ ).

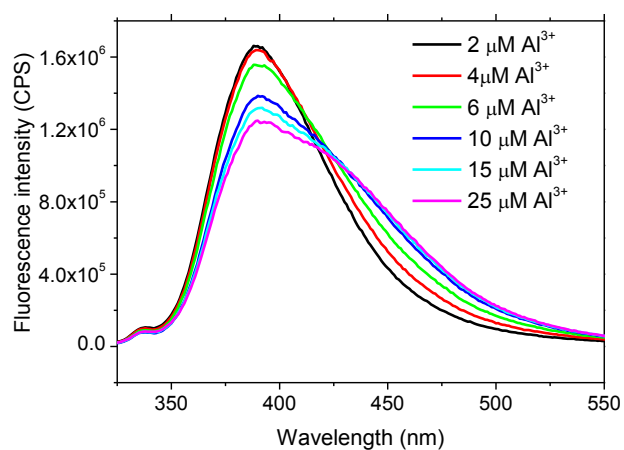

**Figure S4.** Fluorimetric titration spectra of **5** (25 μM) with Al<sup>3+</sup> (0-25 μM).

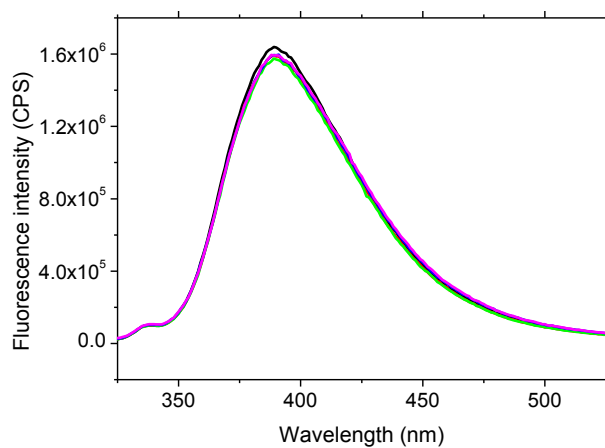

**Figure S5.** Fluorimetric titration spectra of **5** (25 μM) with Mg<sup>2+</sup> (0-25 μM).

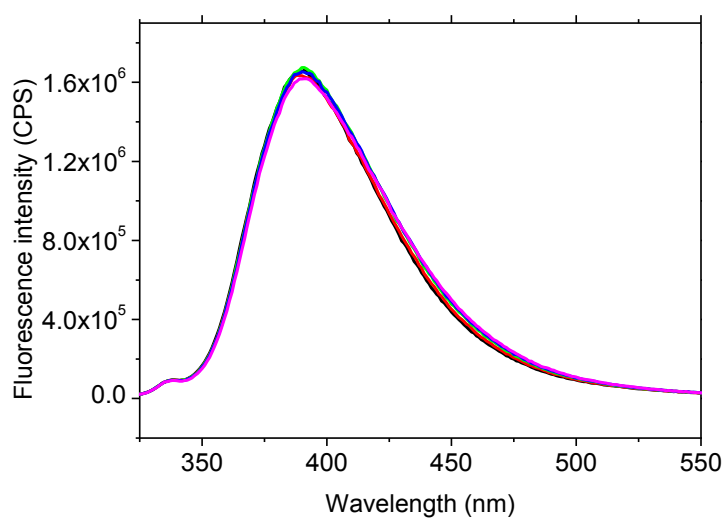

**Figure S6.** Fluorimetric titration spectra of **5** (25 μM) with Mn<sup>2+</sup> (0-25 μM).

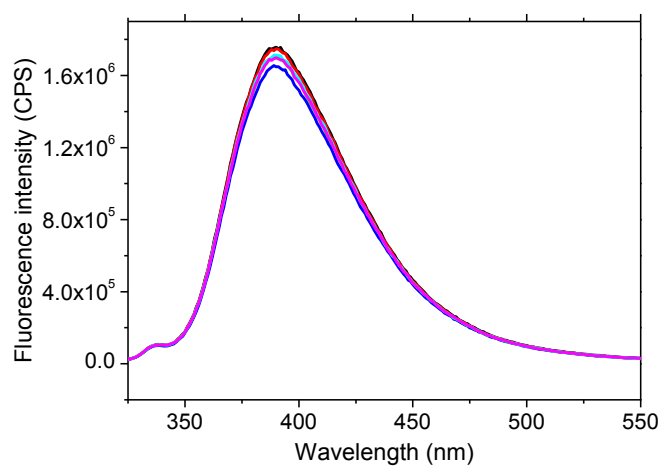

**Figure S7.** Fluorimetric titration spectra of **5** (25  $\mu\text{M}$ ) with  $\text{Pb}^{2+}$  (0-25  $\mu\text{M}$ ).

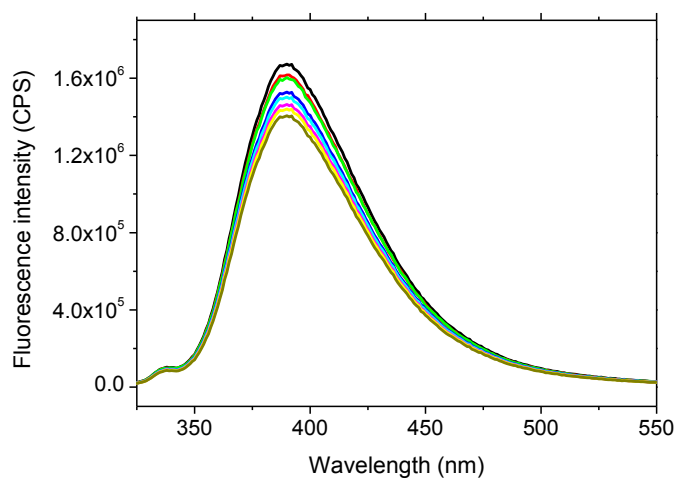

**Figure S8.** Fluorimetric titration spectra of **5** (25  $\mu\text{M}$ ) with  $\text{Sn}^{2+}$  (0-25  $\mu\text{M}$ ).

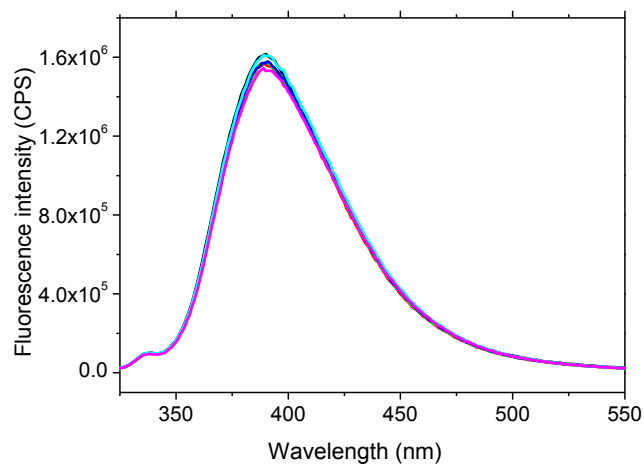

**Figure S9.** Fluorimetric titration spectra of **5** (25  $\mu\text{M}$ ) with  $\text{Sr}^{2+}$  (0-25  $\mu\text{M}$ ).

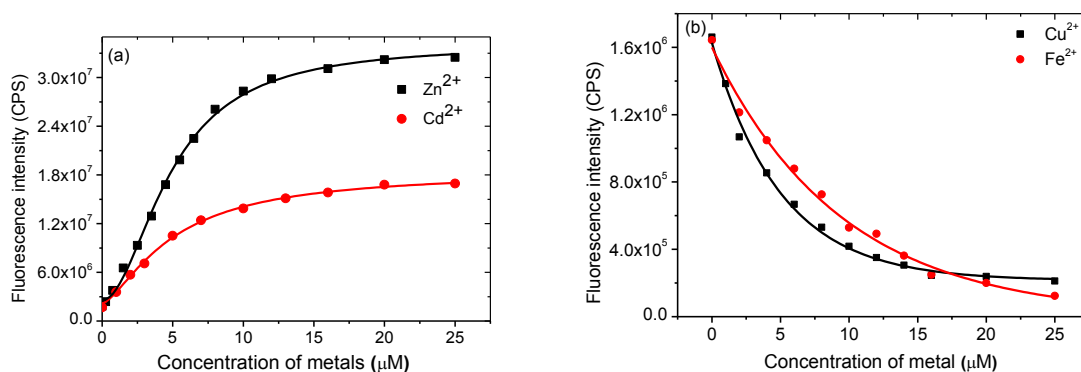

**Figure S10.** (a) Analysis of data at 390 nm from the titration of **5** (25  $\mu\text{M}$ ) with  $\text{Zn}^{2+}$  (0-25  $\mu\text{M}$ ) and  $\text{Cd}^{2+}$  (0-25  $\mu\text{M}$ ) in filtered milliQ water at pH 7.0 using equation (1-3). (b) Analysis of data at 390 nm from the titration of **5** (25  $\mu\text{M}$ ) with  $\text{Cu}^{2+}$ ,  $\text{Fe}^{2+}$  (0-25  $\mu\text{M}$ ) in filtered milliQ water at pH 7.0 using equation (1-3).

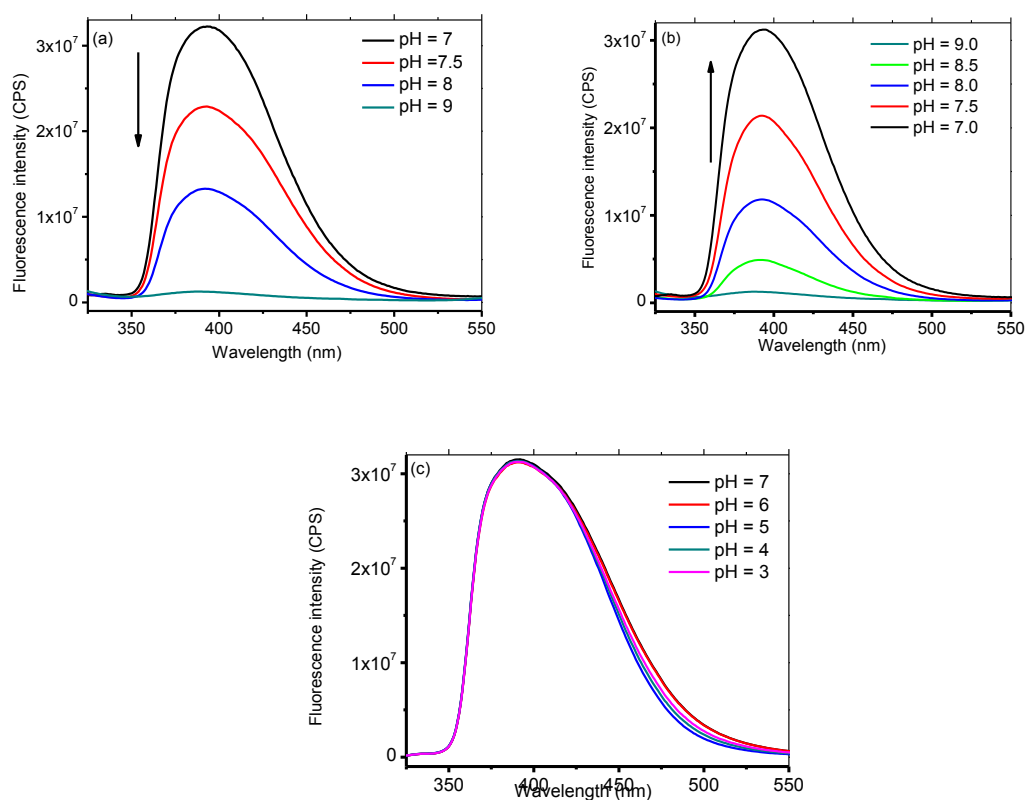

**Figure S11.** Fluorescent profile of bis-triazole **5** (25  $\mu\text{M}$ ) and  $\text{Zn}^{2+}$  (25  $\mu\text{M}$ ) upon gradually (a) increasing pH from 7.0 to 9.0 and (b) decreasing pH from 9.0 to 7.0 (c) decreasing pH from 7.0 to 3.0.

**2.0 Computational methods:** The calculations were carried out at the level of density functional theory (DFT) with Becke-3-Lee-Yang-Parr (B3LYP) exchange functionals in 6-31G basis sets using the Gaussian 03 program.<sup>2,3</sup>

| Optimised Structure                                                               | HOMO                                                                              | LUMO                                                                                |
|-----------------------------------------------------------------------------------|-----------------------------------------------------------------------------------|-------------------------------------------------------------------------------------|
|  |  |  |
| Optimised energy :<br>-1563.340487 Hartree                                        | HOMO (- 6.23 eV)                                                                  | LUMO (-1.90 eV)                                                                     |

**Figure S12.** Optimized minimum energy structure and Molecular orbital amplitude plots of HOMO and LUMO energy levels of **5** was calculated with the use of B3LYP/6-31G(d,p)\* basis set.

<sup>2</sup> Gaussian03 program: Frisch, M. J.; Trucks, G. W.; Schlegel, H. B.; Scuseria, G. E.; Robb, M. A.; Cheeseman, J. R.; Montgomery, J. A., Jr.; Vreven, T.; Kudin, K. N.; Burant, J. C.; Millam, J. M.; Iyengar, S. S.; Tomasi, J.; Barone, V.; Mennucci, B.; Cossi, M.; Scalmani, G.; Rega, N.; Petersson, G. A.; Nakatsuji, H.; Hada, M.; Ehara, M.; Toyota, K.; Fukuda, R.; Hasegawa, J.; Ishida, M.; Nakajima, T.; Honda, Y.; Kitao, O.; Nakai, H.; Klene, M.; Li, X.; Knox, J. E.; Hratchian, H. P.; Cross, J. B.; Bakken, V.; Adamo, C.; Jaramillo, J.; Gomperts, R.; Stratmann, R. E.; Yazyev, O.; Austin, A. J.; Cammi, R.; Pomelli, C.; Ochterski, J. W.; Ayala, P. Y.; Morokuma, K.; Voth, G. A.; Salvador, P.; Dannenberg, J. J.; Zakrzewski, V. G.; Dapprich, S.; Daniels, A. D.; Strain, M. C.; Farkas, O.; Malick, D. K.; Rabuck, A. D.; Raghavachari, K.; Foresman, J. B.; Ortiz, J. V.; Cui, Q.; Baboul, A. G.; Clifford, S.; Cioslowski, J.; Stefanov, B. B.; Liu, G.; Liashenko, A.; Piskorz, P.; Komaromi, I.; Martin, R. L.; Fox, D. J.; Keith, T.; Al-Laham, M. A.; Peng, C. Y.; Nanayakkara, A.; Challacombe, M.; Gill, P. M. W.; Johnson, B.; Chen, W.; Wong, M. W.; Gonzalez, C.; Pople, J. A. *Gaussian 03*, revision D.02; Gaussian, Inc.: Wallingford, CT, **2004**.

<sup>3</sup> B3LYP hybrid functional: (a) Parr, R. G.; Yang, W. *Density Functional Theory of Atoms and Molecules*; Oxford University Press: New York, 1989. (b) Lee, C.; Yang, W.; Parr, R. G. *Phys. Rev. B* **1988**, *37*, 785. (c) Becke, A. D. *Phys. Rev. A* **1988**, *38*, 3098. (d) Lee, C.; Yang, W.; Parr, R. G. *Phys. Rev. B* **1993**, *37*, 785. (e) Becke, A. D. *J. Chem. Phys.* **1993**, *98*, 5648.

**Table S1. Cartesian coordinates for the optimized structure of 5, their zero point energy corrected total energies in Hartree calculated at 298K.**

| -----  |        |        |                         |           |           |  |
|--------|--------|--------|-------------------------|-----------|-----------|--|
| Center | Atomic | Atomic | Coordinates (Angstroms) |           |           |  |
| Number | Number | Type   | X                       | Y         | Z         |  |
| -----  |        |        |                         |           |           |  |
| 1      | 6      | 0      | -0.902284               | 0.777632  | -0.039946 |  |
| 2      | 6      | 0      | -1.114099               | 2.190269  | 0.106610  |  |
| 3      | 6      | 0      | 0.005399                | 3.048672  | -0.136100 |  |
| 4      | 6      | 0      | 1.241134                | 2.449185  | -0.476253 |  |
| 5      | 6      | 0      | 1.337802                | 1.070428  | -0.546490 |  |
| 6      | 1      | 0      | -3.195469               | 2.122294  | 0.713953  |  |
| 7      | 6      | 0      | -2.354072               | 2.768718  | 0.492277  |  |
| 8      | 6      | 0      | -0.155596               | 4.457298  | -0.027155 |  |
| 9      | 1      | 0      | 2.099938                | 3.076453  | -0.696035 |  |
| 10     | 6      | 0      | -1.381439               | 4.954396  | 0.329288  |  |
| 11     | 6      | 0      | -2.495285               | 4.135232  | 0.603236  |  |
| 12     | 1      | 0      | 0.674808                | 5.129612  | -0.215356 |  |
| 13     | 1      | 0      | -3.432049               | 4.593398  | 0.901003  |  |
| 14     | 9      | 0      | -1.547256               | 6.297960  | 0.439150  |  |
| 15     | 7      | 0      | 0.268830                | 0.249913  | -0.342657 |  |
| 16     | 7      | 0      | 3.968122                | -1.067664 | -1.710090 |  |
| 17     | 7      | 0      | -3.053156               | -1.888398 | 1.031361  |  |
| 18     | 6      | 0      | 2.619206                | 0.414673  | -0.856936 |  |
| 19     | 6      | 0      | -2.012826               | -0.186825 | 0.155353  |  |
| 20     | 7      | 0      | -1.979038               | -1.155485 | 1.122232  |  |
| 21     | 6      | 0      | -3.181005               | -0.345696 | -0.565787 |  |
| 22     | 1      | 0      | -3.586413               | 0.174541  | -1.420037 |  |
| 23     | 6      | 0      | 3.902684                | 0.808830  | -0.517259 |  |
| 24     | 1      | 0      | 4.283336                | 1.635023  | 0.063275  |  |



|    |   |   |           |           |           |
|----|---|---|-----------|-----------|-----------|
| 25 | 7 | 0 | 2.714239  | -0.741626 | -1.585272 |
| 26 | 7 | 0 | 4.708332  | -0.133428 | -1.064821 |
| 27 | 7 | 0 | -3.791184 | -1.417107 | 0.001062  |
| 28 | 6 | 0 | -5.074168 | -2.033162 | -0.322468 |
| 29 | 1 | 0 | -5.245694 | -1.893980 | -1.392812 |
| 30 | 1 | 0 | -4.982518 | -3.102582 | -0.123261 |
| 31 | 6 | 0 | 6.155086  | -0.287947 | -0.962301 |
| 32 | 1 | 0 | 6.463623  | -0.845448 | -1.848581 |
| 33 | 1 | 0 | 6.618398  | 0.701857  | -0.996074 |
| 34 | 6 | 0 | 6.564944  | -1.017481 | 0.326894  |
| 35 | 1 | 0 | 6.063850  | -2.003817 | 0.357446  |
| 36 | 1 | 0 | 6.200111  | -0.442394 | 1.185710  |
| 37 | 6 | 0 | -6.218636 | -1.443699 | 0.516543  |
| 38 | 1 | 0 | -6.275285 | -0.348339 | 0.348587  |
| 39 | 1 | 0 | -5.974446 | -1.598459 | 1.572367  |
| 40 | 6 | 0 | 8.473085  | -1.513437 | 1.775270  |
| 41 | 6 | 0 | 8.633061  | -2.111505 | -0.463630 |
| 42 | 6 | 0 | 9.964655  | -1.832019 | 1.573336  |
| 43 | 1 | 0 | 7.934298  | -2.410415 | 2.140090  |
| 44 | 1 | 0 | 8.293083  | -0.702785 | 2.489055  |
| 45 | 6 | 0 | 10.068679 | -2.254363 | 0.078555  |
| 46 | 1 | 0 | 8.605348  | -1.772151 | -1.503420 |
| 47 | 1 | 0 | 8.100868  | -3.082081 | -0.413125 |
| 48 | 1 | 0 | 10.574152 | -0.944053 | 1.764495  |
| 49 | 1 | 0 | 10.302789 | -2.616528 | 2.256329  |
| 50 | 1 | 0 | 10.752498 | -1.593742 | -0.462030 |
| 51 | 1 | 0 | 10.436955 | -3.276975 | -0.043582 |
| 52 | 6 | 0 | -8.526662 | -1.839721 | 1.228687  |
| 53 | 6 | 0 | -8.099738 | -1.752198 | -1.054066 |
| 54 | 6 | 0 | -9.797763 | -2.416391 | 0.584023  |

|    |   |   |            |           |           |
|----|---|---|------------|-----------|-----------|
| 55 | 1 | 0 | -8.645251  | -0.751837 | 1.407849  |
| 56 | 1 | 0 | -8.269075  | -2.309439 | 2.183260  |
| 57 | 6 | 0 | -9.533317  | -2.311504 | -0.946482 |
| 58 | 1 | 0 | -7.541770  | -2.181250 | -1.892129 |
| 59 | 1 | 0 | -8.123330  | -0.651851 | -1.194179 |
| 60 | 1 | 0 | -9.930755  | -3.461327 | 0.878288  |
| 61 | 1 | 0 | -10.691969 | -1.869048 | 0.895570  |
| 62 | 1 | 0 | -9.600706  | -3.295482 | -1.418821 |
| 63 | 1 | 0 | -10.250227 | -1.657272 | -1.450934 |
| 64 | 7 | 0 | -7.482354  | -2.099739 | 0.231253  |
| 65 | 7 | 0 | 8.010943   | -1.129304 | 0.435438  |

Energy (B3LYP/6-311+G(d,p)\*) = -1563.340487 Hartree.

### **3.0 Cell culture methods:**

A375 cells were cultured in Dulbecco's modified Eagle's medium (DMEM, Himedia) supplemented with 10 % fetal bovine serum (FBS, Himedia), 50 µg/mL penicillin/streptomycin (Himedia) at 37 °C in a CO<sub>2</sub>/air (5/95) incubator. The cells were cultured 2 days before the loading of **5** on 35 mm diameter glass-bottomed cover slips. Then the cells were washed with phosphate-buffered saline (PBS) and bathed in DMEM with 2.5 µM **5** for 30 min at 37 °C, washed with PBS three times to remove the excess **5** and bathed in PBS (2 mL) before imaging. To observe the increase and decrease of fluorescence intensity of **5** upon binding with Zn<sup>2+</sup> and Fe<sup>2+</sup>, the cells treated with **5** had been incubated with 2.5 µM ZnSO<sub>4</sub> or FeCl<sub>2</sub> for 30 min at 37 °C. For the confirmation of increase of fluorescence of **5** binding with Zn<sup>2+</sup>, we used EDTA as a chelating agent and incubate the ZnSO<sub>4</sub> treated cells with 25 µM EDTA for 30 min at 37 °C. All the treated cells were washed three times with PBS and bathed in PBS (2 mL) before taking the images using Confocal laser scanning microscopy (CLSM). CLSM images were taken with a Zeiss LSM710 confocal system that was mounted on a Nikon Eclipse 800 microscope. Laser excitation was used and images were taken at 480 nm. Then, the image was recorded and, at the same time, the intensity of the samples were measured. Images of the fibers were taken by using a X10 lens.

## 4.0 NMR spectra of all the compounds

### $^1\text{H}$ and $^{13}\text{C}$ NMR of 2:

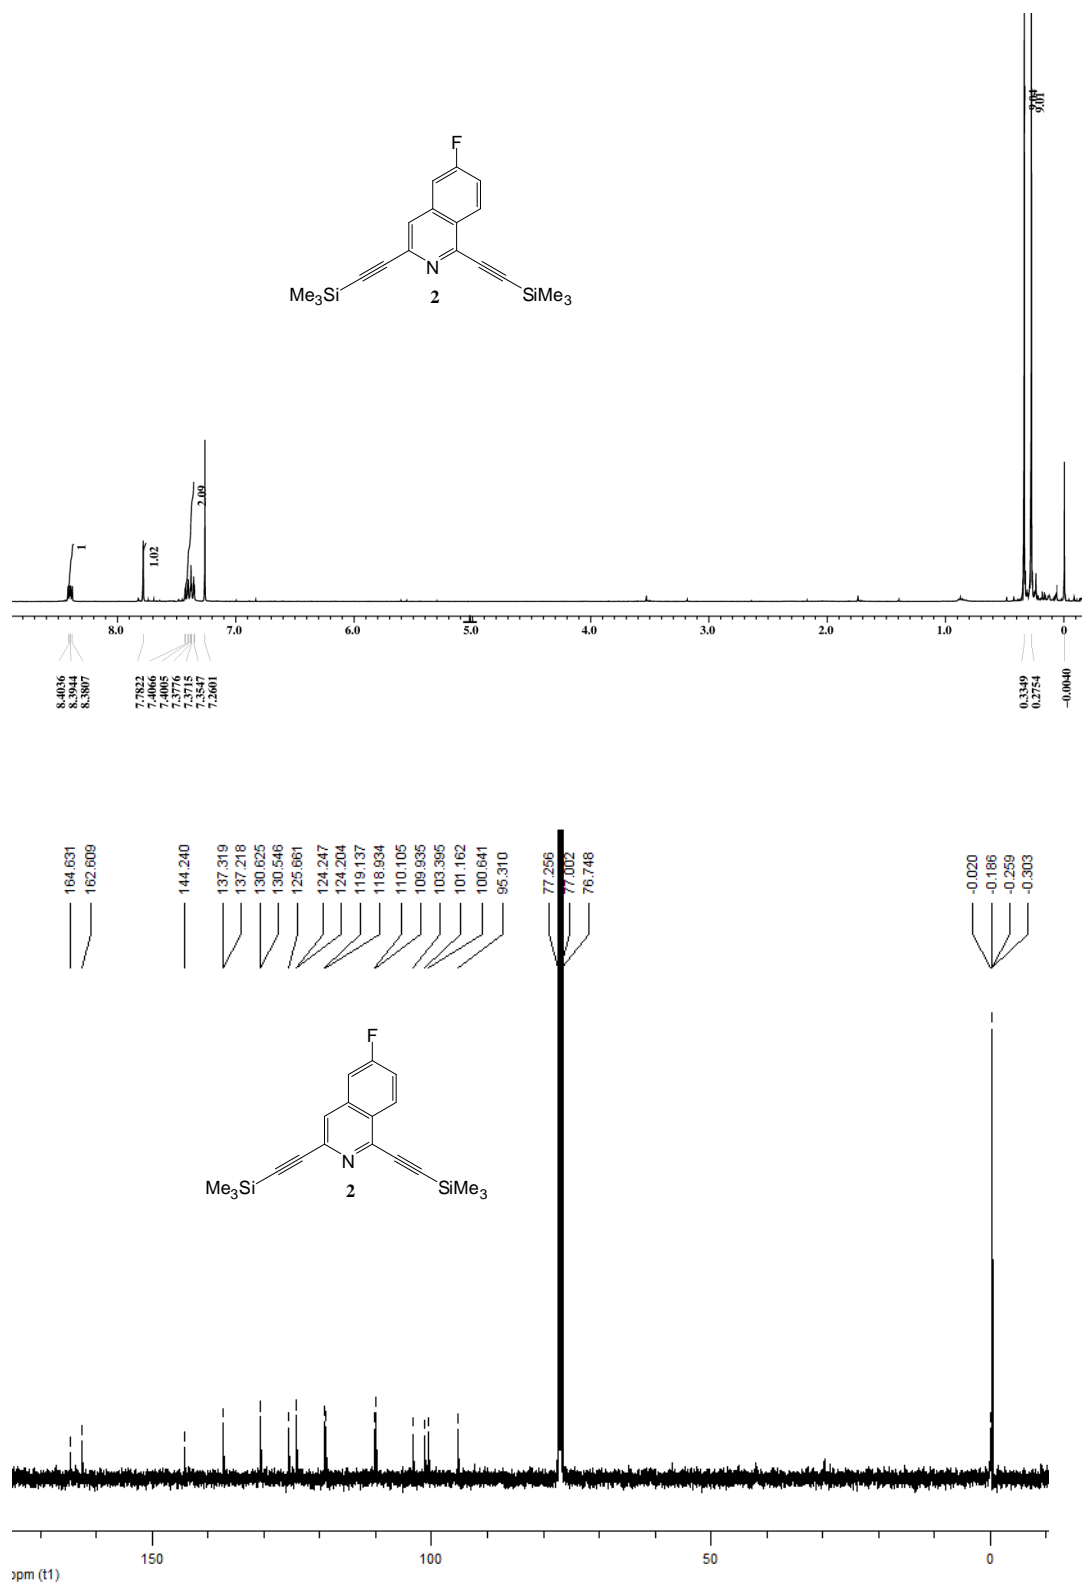

### $^1\text{H}$ and $^{13}\text{C}$ NMR of 3:

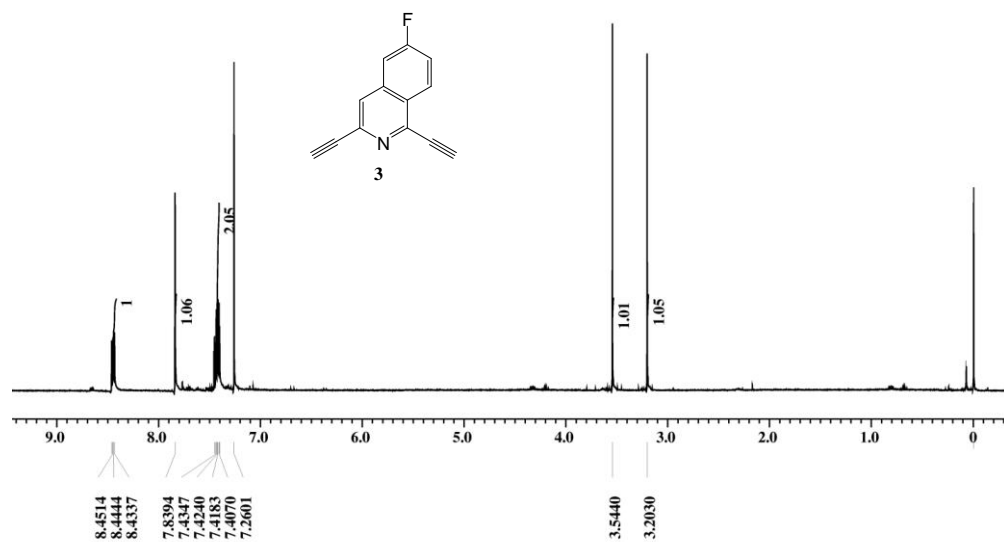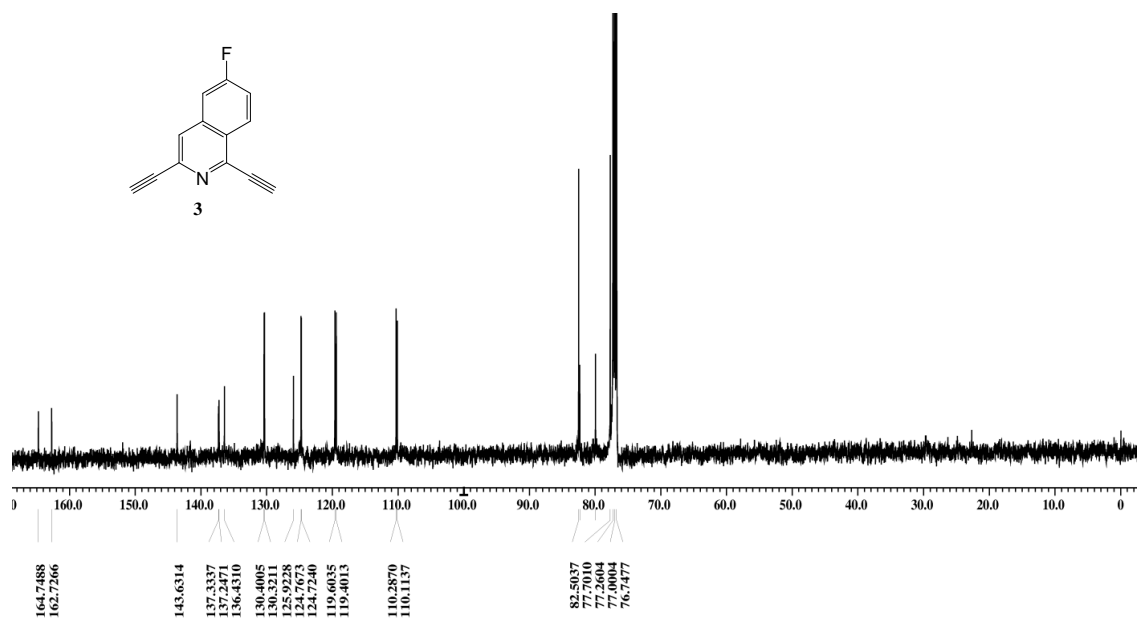

### <sup>1</sup>H and <sup>13</sup>C NMR of 5:

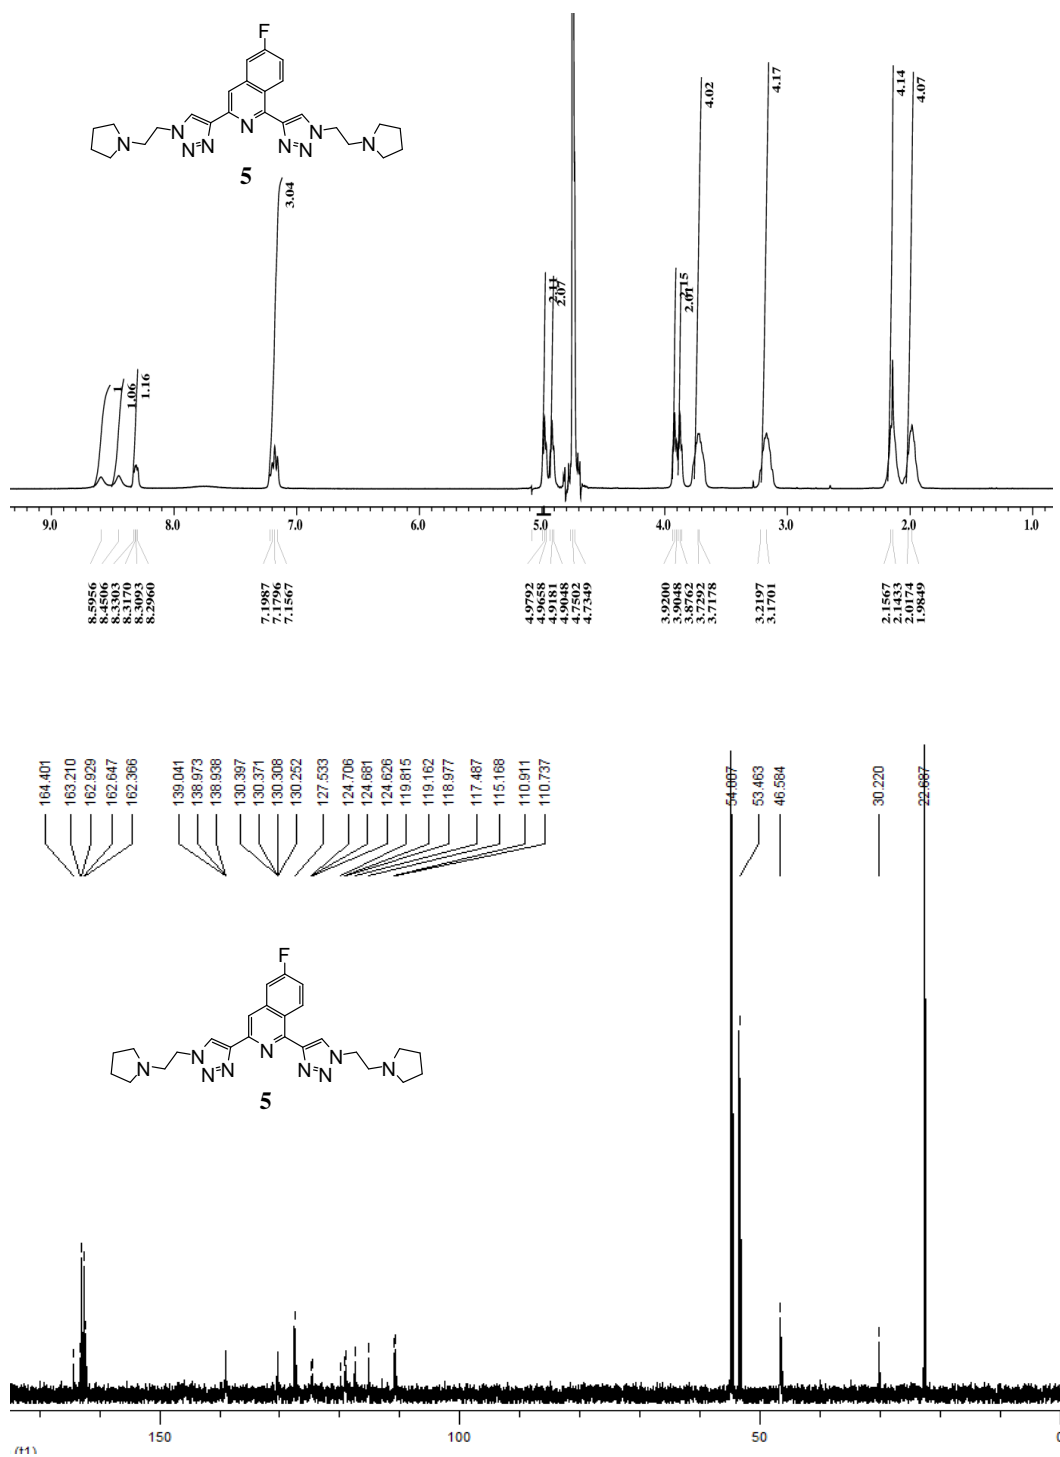

Supplement: c3ob40075a.pdf [file c3ob40075a.pdf]
